# Supplementary material
Source: publisher figshare collection journal article supplement (https://plos.figshare.com/articles/dataset/_/5148514)
Supplement: Supplementary file [file 1]

**Table S1. Age, total CC and CC subdivisions in chimpanzees and humans during the developmental course of the study period.**

| Subject | Species | Sex | Age (months) | Rostrum | Genu   | Rostral Body | CC area (mm <sup>2</sup> ) |                   | Isthmus | Splenium | Total  |
|---------|---------|-----|--------------|---------|--------|--------------|----------------------------|-------------------|---------|----------|--------|
|         |         |     |              |         |        |              | Anterior Midbody           | Posterior Midbody |         |          |        |
| Ayumu   | Chimp   | M   | 6            | 2.99    | 20.94  | 24.82        | 17.94                      | 14.36             | 10.47   | 34.69    | 126.21 |
| Ayumu   | Chimp   | M   | 12           | 5.38    | 29.61  | 27.51        | 18.84                      | 14.65             | 14.95   | 45.76    | 156.70 |
| Ayumu   | Chimp   | M   | 24           | 5.98    | 43.37  | 30.51        | 22.73                      | 14.65             | 15.85   | 47.55    | 180.64 |
| Ayumu   | Chimp   | M   | 36           | 6.28    | 46.36  | 32.00        | 23.03                      | 17.94             | 19.14   | 58.02    | 202.77 |
| Ayumu   | Chimp   | M   | 48           | 6.28    | 47.25  | 29.91        | 22.43                      | 18.24             | 20.04   | 62.51    | 206.66 |
| Ayumu   | Chimp   | M   | 60           | 8.67    | 49.35  | 32.00        | 22.43                      | 20.93             | 20.04   | 64.00    | 217.42 |
| Ayumu   | Chimp   | M   | 72           | 8.97    | 49.65  | 35.89        | 26.02                      | 21.83             | 21.53   | 65.80    | 229.69 |
| Cleo    | Chimp   | F   | 6            | 3.29    | 31.10  | 28.11        | 18.54                      | 16.45             | 12.86   | 40.97    | 151.32 |
| Cleo    | Chimp   | F   | 12           | 4.79    | 40.67  | 40.08        | 22.13                      | 19.44             | 13.46   | 44.26    | 184.83 |
| Cleo    | Chimp   | F   | 24           | 6.88    | 47.85  | 39.48        | 23.63                      | 19.44             | 13.76   | 49.35    | 200.39 |
| Cleo    | Chimp   | F   | 36           | 7.18    | 48.45  | 40.97        | 25.12                      | 20.94             | 14.06   | 51.74    | 208.46 |
| Cleo    | Chimp   | F   | 48           | 7.48    | 51.14  | 45.16        | 27.51                      | 23.63             | 17.05   | 59.22    | 231.19 |
| Cleo    | Chimp   | F   | 60           | 8.37    | 56.52  | 47.55        | 29.31                      | 26.32             | 17.05   | 61.31    | 246.43 |
| Cleo    | Chimp   | F   | 72           | 9.57    | 61.01  | 47.85        | 30.51                      | 26.92             | 19.14   | 64.90    | 259.90 |
| Pal     | Chimp   | F   | 6            | 2.69    | 17.05  | 19.44        | 14.95                      | 14.95             | 10.77   | 27.51    | 107.36 |
| Pal     | Chimp   | F   | 12           | 5.98    | 37.68  | 25.72        | 18.54                      | 19.74             | 13.16   | 33.20    | 154.02 |
| Pal     | Chimp   | F   | 24           | 5.98    | 44.56  | 28.71        | 20.34                      | 20.04             | 13.76   | 35.29    | 168.68 |
| Pal     | Chimp   | F   | 36           | 6.28    | 47.85  | 29.01        | 20.64                      | 22.13             | 14.36   | 38.88    | 179.15 |
| Pal     | Chimp   | F   | 48           | 6.88    | 48.15  | 29.01        | 22.73                      | 23.63             | 14.36   | 42.77    | 187.53 |
| Pal     | Chimp   | F   | 60           | 7.78    | 48.45  | 30.51        | 24.82                      | 27.22             | 14.95   | 44.56    | 198.29 |
| Pal     | Chimp   | F   | 72           | 10.17   | 49.05  | 37.08        | 27.22                      | 31.10             | 17.94   | 48.75    | 221.31 |
| Pico    | Chimp   | F   | 1.8          | 2.99    | 19.74  | 11.66        | 10.17                      | 10.17             | 7.48    | 23.33    | 85.54  |
| Pico    | Chimp   | F   | 3            | 3.59    | 12.26  | 19.14        | 15.85                      | 11.36             | 9.27    | 20.94    | 92.41  |
| Pico    | Chimp   | F   | 4            | 4.79    | 17.35  | 19.14        | 13.76                      | 13.46             | 8.37    | 22.13    | 99.00  |
| Pico    | Chimp   | F   | 6            | 7.78    | 22.43  | 23.93        | 20.64                      | 17.35             | 11.07   | 31.40    | 134.60 |
| Pico    | Chimp   | F   | 9            | 6.88    | 29.91  | 22.43        | 21.53                      | 17.35             | 12.86   | 34.39    | 145.35 |
| Pico    | Chimp   | F   | 24           | 7.18    | 32.90  | 32.90        | 21.53                      | 20.93             | 12.26   | 33.20    | 160.90 |
| Akira   | Chimp   | M   | 388          | 5.38    | 42.47  | 51.44        | 34.99                      | 28.11             | 26.02   | 72.67    | 261.08 |
| Gon     | Chimp   | M   | 435          | 8.97    | 72.08  | 66.09        | 47.85                      | 39.48             | 25.72   | 96.30    | 356.49 |
| Reo     | Chimp   | M   | 278          | 11.07   | 86.13  | 67.59        | 49.35                      | 34.69             | 20.64   | 87.93    | 357.40 |
| Ai      | Chimp   | F   | 382          | 26.32   | 100.79 | 66.09        | 48.75                      | 46.95             | 40.67   | 105.87   | 435.44 |
| Cloe    | Chimp   | F   | 363          | 5.98    | 76.54  | 38.57        | 53.52                      | 47.54             | 33.79   | 72.06    | 328.00 |
| Mari    | Chimp   | F   | 393          | 10.17   | 67.59  | 73.57        | 50.54                      | 49.65             | 39.18   | 102.58   | 393.28 |
| Pan     | Chimp   | F   | 312          | 5.38    | 62.81  | 36.79        | 35.59                      | 31.10             | 22.13   | 65.80    | 259.60 |
| Popo    | Chimp   | F   | 294          | 11.96   | 77.46  | 46.06        | 36.79                      | 30.80             | 22.43   | 79.85    | 305.35 |
| Puchi   | Chimp   | F   | 385          | 10.47   | 46.36  | 52.04        | 31.70                      | 37.38             | 22.43   | 60.71    | 261.09 |
| Reiko   | Chimp   | F   | 512          | 6.28    | 75.37  | 53.83        | 46.66                      | 51.74             | 29.91   | 85.83    | 349.62 |
| 1       | Human   | M   | 1            | 5       | 17     | 28           | 14                         | 14                | 10      | 32       | 120    |
| 2       | Human   | M   | 1            | 4       | 24     | 25           | 15                         | 10                | 8       | 32       | 118    |
| 3       | Human   | M   | 2            | 5       | 27     | 40           | 22                         | 20                | 17      | 78       | 209    |
| 4       | Human   | M   | 3            | 9       | 23     | 34           | 16                         | 17                | 15      | 35       | 149    |
| 5       | Human   | M   | 3            | 4       | 32     | 35           | 23                         | 22                | 9       | 57       | 182    |
| 6       | Human   | M   | 4            | 3       | 25     | 32           | 19                         | 23                | 16      | 41       | 159    |
| 7       | Human   | M   | 5            | 12      | 45     | 49           | 31                         | 32                | 24      | 100      | 293    |
| 8       | Human   | M   | 7            | 5       | 46     | 50           | 22                         | 29                | 24      | 82       | 258    |
| 9       | Human   | M   | 8            | 6       | 66     | 50           | 36                         | 25                | 20      | 97       | 300    |
| 10      | Human   | M   | 9            | 21      | 59     | 61           | 34                         | 40                | 28      | 105      | 348    |
| 11      | Human   | M   | 10           | 9       | 59     | 59           | 30                         | 29                | 20      | 75       | 281    |
| 12      | Human   | M   | 11           | 18      | 67     | 72           | 41                         | 35                | 18      | 110      | 361    |
| 13      | Human   | M   | 12           | 12      | 45     | 41           | 24                         | 27                | 16      | 74       | 239    |
| 14      | Human   | M   | 12           | 9       | 44     | 47           | 25                         | 25                | 17      | 60       | 227    |
| 15      | Human   | M   | 14           | 20      | 80     | 82           | 57                         | 45                | 28      | 157      | 469    |
| 16      | Human   | M   | 15           | 8       | 71     | 66           | 36                         | 33                | 23      | 119      | 356    |
| 17      | Human   | M   | 16           | 8       | 110    | 77           | 53                         | 39                | 29      | 118      | 434    |
| 18      | Human   | M   | 19           | 12      | 105    | 64           | 46                         | 34                | 20      | 108      | 389    |
| 19      | Human   | M   | 23           | 23      | 102    | 86           | 50                         | 40                | 37      | 131      | 469    |
| 20      | Human   | M   | 25           | 10      | 125    | 70           | 57                         | 53                | 35      | 163      | 513    |
| 21      | Human   | M   | 27           | 5       | 91     | 49           | 38                         | 42                | 21      | 130      | 376    |
| 22      | Human   | M   | 28           | 6       | 123    | 67           | 59                         | 44                | 29      | 137      | 465    |
| 23      | Human   | M   | 30           | 9       | 109    | 65           | 54                         | 36                | 23      | 126      | 422    |
| 24      | Human   | M   | 34           | 16      | 86     | 67           | 41                         | 30                | 19      | 83       | 342    |
| 25      | Human   | M   | 37           | 29      | 119    | 77           | 43                         | 35                | 51      | 132      | 486    |

|     |       |   |     |    |     |     |    |    |    |     |     |
|-----|-------|---|-----|----|-----|-----|----|----|----|-----|-----|
| 26  | Human | M | 45  | 13 | 87  | 61  | 57 | 53 | 36 | 126 | 433 |
| 27  | Human | M | 52  | 9  | 96  | 68  | 47 | 35 | 38 | 124 | 417 |
| 28  | Human | M | 56  | 16 | 110 | 98  | 54 | 53 | 33 | 138 | 502 |
| 29  | Human | M | 65  | 8  | 128 | 77  | 65 | 59 | 41 | 172 | 550 |
| 30  | Human | M | 66  | 15 | 117 | 86  | 64 | 45 | 48 | 158 | 533 |
| 31  | Human | M | 80  | 9  | 110 | 58  | 51 | 50 | 37 | 144 | 459 |
| 32  | Human | M | 81  | 13 | 103 | 42  | 48 | 50 | 31 | 110 | 397 |
| 33  | Human | M | 88  | 22 | 91  | 78  | 43 | 40 | 36 | 122 | 432 |
| 34  | Human | M | 88  | 18 | 98  | 69  | 54 | 50 | 35 | 122 | 446 |
| 35  | Human | M | 99  | 17 | 109 | 59  | 47 | 44 | 44 | 149 | 469 |
| 36  | Human | M | 101 | 18 | 142 | 92  | 64 | 63 | 51 | 181 | 611 |
| 37  | Human | M | 116 | 16 | 111 | 77  | 59 | 46 | 32 | 120 | 461 |
| 38  | Human | M | 126 | 25 | 101 | 82  | 64 | 52 | 39 | 168 | 531 |
| 39  | Human | M | 126 | 11 | 90  | 66  | 60 | 53 | 39 | 138 | 457 |
| 40  | Human | M | 126 | 14 | 158 | 69  | 55 | 49 | 40 | 165 | 550 |
| 41  | Human | F | 2   | 6  | 22  | 27  | 18 | 14 | 12 | 55  | 154 |
| 42  | Human | F | 3   | 3  | 48  | 21  | 16 | 14 | 13 | 62  | 177 |
| 43  | Human | F | 4   | 5  | 30  | 30  | 15 | 16 | 16 | 52  | 164 |
| 44  | Human | F | 6   | 17 | 58  | 55  | 30 | 33 | 28 | 79  | 300 |
| 45  | Human | F | 11  | 6  | 105 | 62  | 37 | 40 | 22 | 122 | 394 |
| 46  | Human | F | 16  | 13 | 63  | 55  | 34 | 36 | 23 | 86  | 310 |
| 47  | Human | F | 17  | 11 | 74  | 55  | 43 | 42 | 34 | 95  | 354 |
| 48  | Human | F | 18  | 12 | 87  | 65  | 38 | 22 | 19 | 97  | 340 |
| 49  | Human | F | 18  | 10 | 66  | 70  | 34 | 32 | 18 | 71  | 301 |
| 50  | Human | F | 22  | 14 | 84  | 54  | 40 | 27 | 24 | 104 | 347 |
| 51  | Human | F | 30  | 16 | 111 | 61  | 41 | 39 | 25 | 102 | 395 |
| 52  | Human | F | 32  | 11 | 102 | 67  | 45 | 44 | 43 | 120 | 432 |
| 53  | Human | F | 38  | 16 | 111 | 61  | 41 | 39 | 25 | 102 | 395 |
| 54  | Human | F | 47  | 11 | 102 | 67  | 45 | 44 | 43 | 120 | 432 |
| 55  | Human | F | 48  | 12 | 85  | 74  | 42 | 41 | 23 | 131 | 408 |
| 56  | Human | F | 61  | 20 | 122 | 73  | 56 | 50 | 31 | 148 | 500 |
| 57  | Human | F | 71  | 14 | 111 | 78  | 64 | 66 | 55 | 142 | 530 |
| 58  | Human | F | 72  | 20 | 148 | 73  | 55 | 49 | 33 | 142 | 520 |
| 59  | Human | F | 77  | 8  | 102 | 62  | 48 | 49 | 34 | 146 | 449 |
| 60  | Human | F | 80  | 13 | 87  | 62  | 56 | 55 | 38 | 129 | 440 |
| 61  | Human | F | 102 | 12 | 132 | 64  | 50 | 44 | 42 | 141 | 485 |
| 62  | Human | F | 103 | 7  | 100 | 44  | 47 | 45 | 26 | 133 | 402 |
| 63  | Human | F | 103 | 7  | 119 | 51  | 52 | 55 | 26 | 142 | 452 |
| 64  | Human | F | 108 | 13 | 98  | 74  | 52 | 40 | 35 | 158 | 470 |
| 65  | Human | F | 109 | 18 | 122 | 85  | 55 | 48 | 37 | 193 | 558 |
| 66  | Human | F | 111 | 19 | 102 | 63  | 41 | 46 | 33 | 131 | 435 |
| 67  | Human | F | 114 | 14 | 119 | 60  | 62 | 58 | 52 | 164 | 529 |
| 68  | Human | F | 115 | 19 | 126 | 96  | 57 | 54 | 32 | 170 | 554 |
| 69  | Human | F | 115 | 20 | 124 | 80  | 58 | 48 | 50 | 149 | 529 |
| 70  | Human | F | 120 | 9  | 118 | 81  | 53 | 52 | 35 | 152 | 500 |
| 71  | Human | F | 120 | 15 | 103 | 93  | 50 | 52 | 46 | 159 | 518 |
| 72  | Human | F | 122 | 11 | 119 | 61  | 51 | 49 | 47 | 142 | 480 |
| 114 | Human | M | 216 | 15 | 171 | 78  | 76 | 85 | 61 | 197 | 683 |
| 143 | Human | M | 223 | 32 | 156 | 91  | 88 | 77 | 53 | 172 | 669 |
| 173 | Human | M | 238 | 41 | 187 | 73  | 53 | 41 | 56 | 177 | 628 |
| 174 | Human | M | 244 | 17 | 138 | 71  | 67 | 58 | 60 | 185 | 596 |
| 183 | Human | M | 244 | 19 | 146 | 94  | 65 | 56 | 40 | 173 | 593 |
| 175 | Human | M | 245 | 11 | 155 | 82  | 72 | 71 | 65 | 163 | 619 |
| 172 | Human | M | 301 | 38 | 110 | 96  | 66 | 48 | 32 | 161 | 551 |
| 052 | Human | F | 216 | 21 | 90  | 83  | 61 | 54 | 37 | 158 | 504 |
| 141 | Human | F | 224 | 19 | 131 | 90  | 75 | 72 | 47 | 200 | 634 |
| 171 | Human | F | 238 | 10 | 114 | 69  | 52 | 62 | 43 | 157 | 507 |
| 134 | Human | F | 244 | 24 | 146 | 102 | 72 | 66 | 50 | 178 | 638 |
| 168 | Human | F | 248 | 9  | 132 | 86  | 67 | 55 | 39 | 191 | 579 |
| 169 | Human | F | 253 | 23 | 126 | 95  | 59 | 61 | 46 | 206 | 616 |
| 170 | Human | F | 268 | 21 | 110 | 92  | 57 | 54 | 58 | 155 | 547 |
